# Supplementary material
Source: PubMed Central journal article supplement (PMC8365176)
Supplement: Supplementary_Data.pdf [file Supplementary_Data.pdf]

Figure S1. pGL4 luciferase vector construction including the NUPR1 promoter and JUN binding site deletion. (A) Series of deletion fragments of the NUPR1 promoter sequence were inserted into *KpnI* and *HindIII* sites of the pGL4-basic reporter vector. The sizes of inserts are shown immediately upstream of each start site. The length of the base pairs removed from the original full-length promoter clone, where nucleotides -2434 to +713 were inserted (construct pNUPR308), are presented on the right side of the name for each construct. The transcription start site is located at nucleotide 2499 according to GenBank submission AF069074, which is designated as +1. (B) Sequencing information showing the JUN binding site deletion from the NUPR1 full length promoter construct (i.e. pNUPR308). The JUN binding site corresponds to position -2339 to -2333 in pNUPR308. NUPR1, nuclear protein 1.

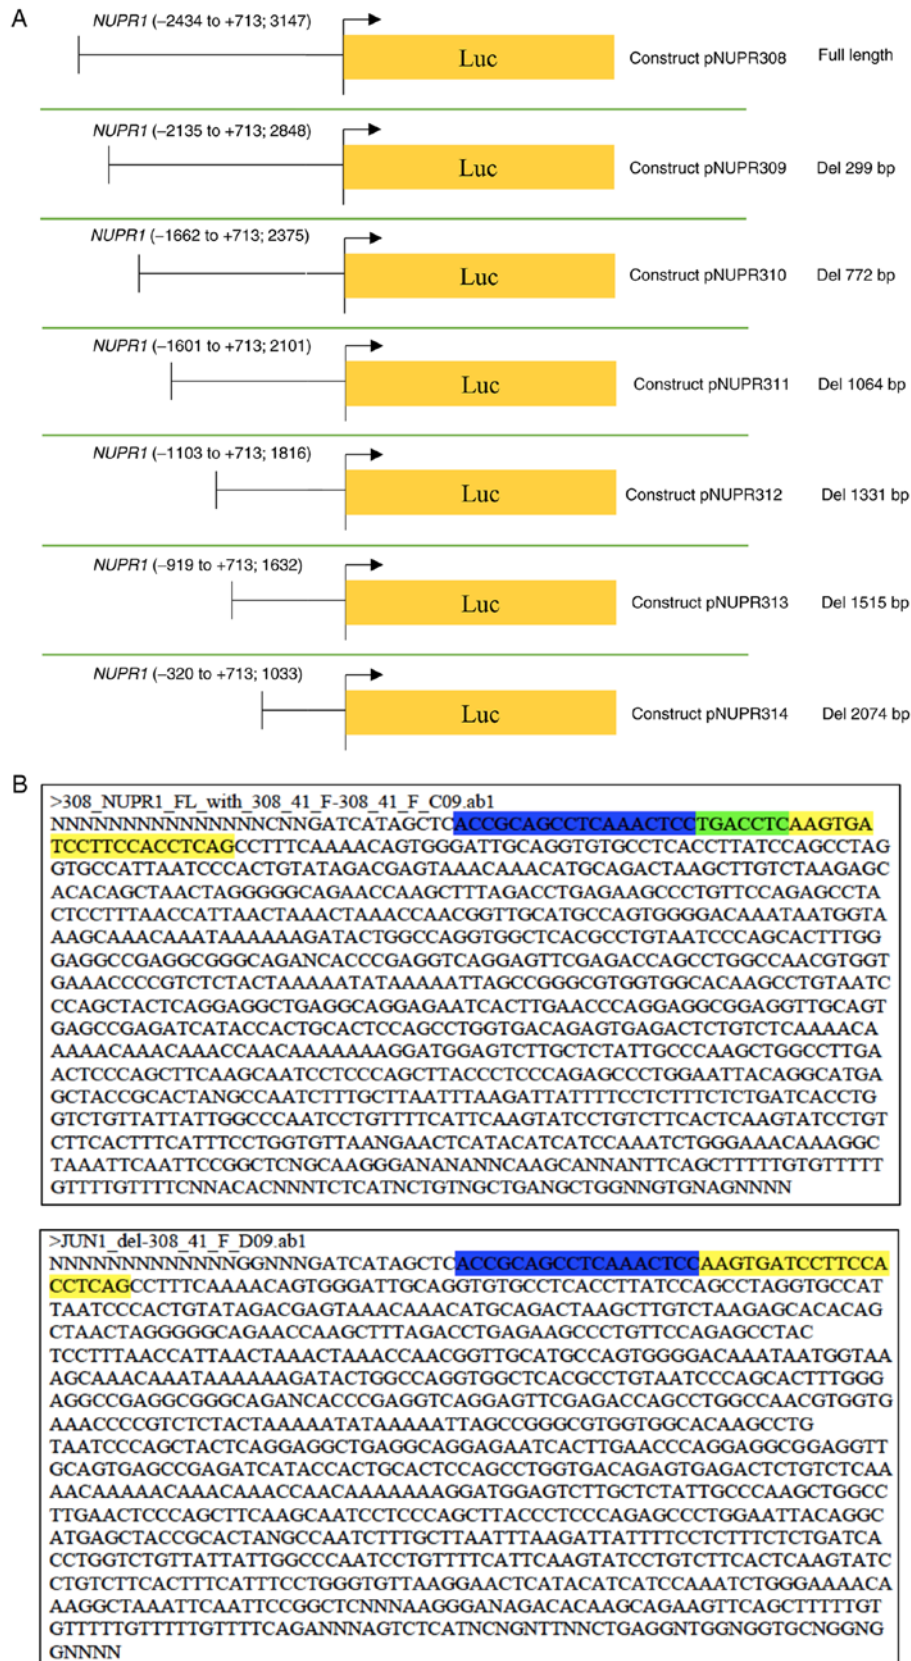

Figure S2. Colony formation and anchorage-independent growth in *NUPR1* knockdown Ni-transformed BEAS-2B cells. (A) Representative images of colony formation of control shRNA (ctrl) knockdown and *NUPR1* knockdown (*NUPR1* KD) Ni-transformed BEAS-2B cells. (B) Representative images of soft agar growth of control shRNA (ctrl) knockdown and *NUPR1* knockdown (*NUPR1* KD) Ni-transformed BEAS-2B cells. *NUPR1*, nuclear protein 1.

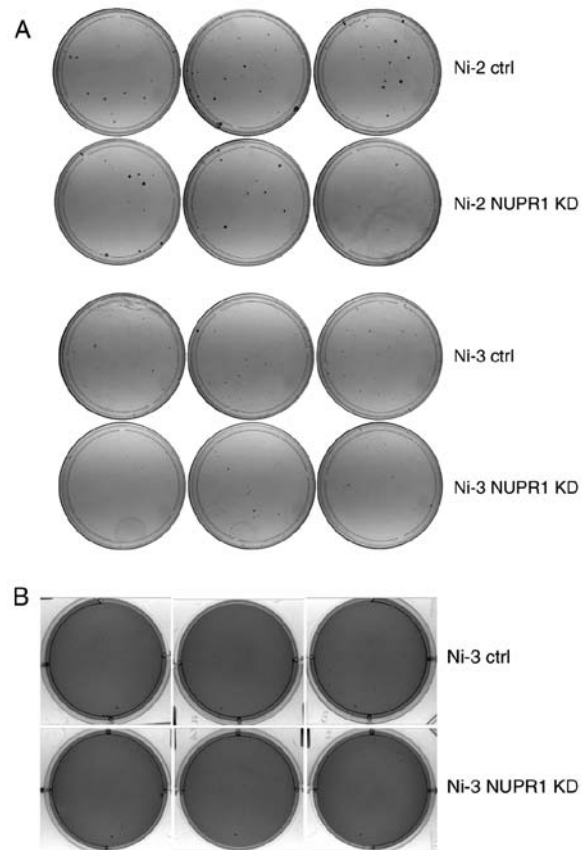

Table SI. Primers used to amplify and clone human *NUPR1* promoter sequence.

| Primer reference | Primer sequence        |
|------------------|------------------------|
| 915NUPR1FD       | TATTGGCCGGATCCTGTTTTCA |
| 2394NUPR1RD      | GAAGAGTCGGATCCTGAGTCCA |
| 1839NUPR1NF      | GAGGTCAGGAGTTCAAGATCAG |
| 2523NUPR1NRD     | TCCACTCCTGCAGCTTATAAG  |
| 72NUPR1FD        | CTACCGTGCCCGGATCCAACCT |
| 1724NUPR1NR      | CAGGGTCCCCAGTAATGTAATC |
| 2099NUPR1NF      | GTGGAAGCCACTGACTTGT    |
| 3223NUPR1NRD     | GGAATGTGGGATCCCAGATGTG |

The primer reference name is listed in the left column, and the corresponding sequence information is listed in the right column. NUPR1, nuclear protein 1.

Table SII. List of recombinants used in the transfection experiments.

| Construct | From nucleotide | To nucleotide |
|-----------|-----------------|---------------|
| pNUPR308  | 94              | 3211          |
| pNUPR309  | 383             | 3211          |
| pNUPR310  | 856             | 3211          |
| pNUPR310  | 1129            | 3211          |
| pNUPR312  | 1396            | 3211          |
| pNUPR313  | 1580            | 3211          |
| pNUPR314  | 2139            | 3211          |

Nucleotide numbers are from GenBank submission AF069074. The transcription start site is located at nucleotide 2499 according to GenBank submission AF069074, which is designated as +1.
